# Supplementary material for: Human Stem Cell‐Derived Endothelial‐Hepatic Platform for Efficacy Testing of Vascular‐Protective Metabolites from Nutraceuticals
Source: PubMed Central journal article supplement (PMC5442778; doi:10.5966/sctm.2016-0129), 2016-10-07
Supplement: SCT3-6-0851-s001.pdf [file SCT3-6-0851-s001.pdf]

## Supplementary Information

a

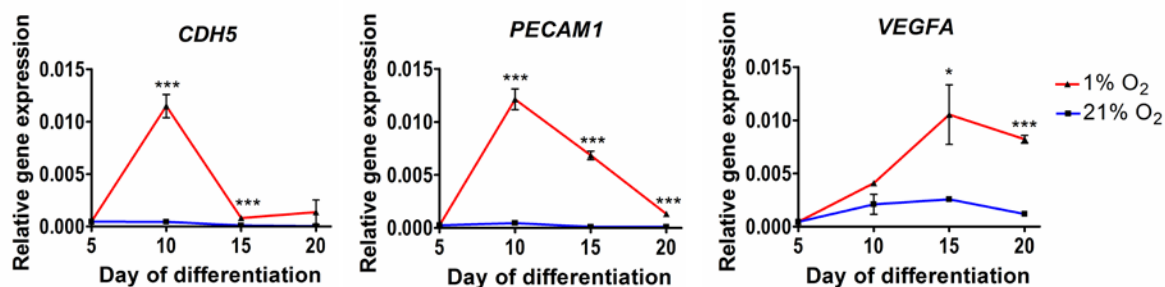

b

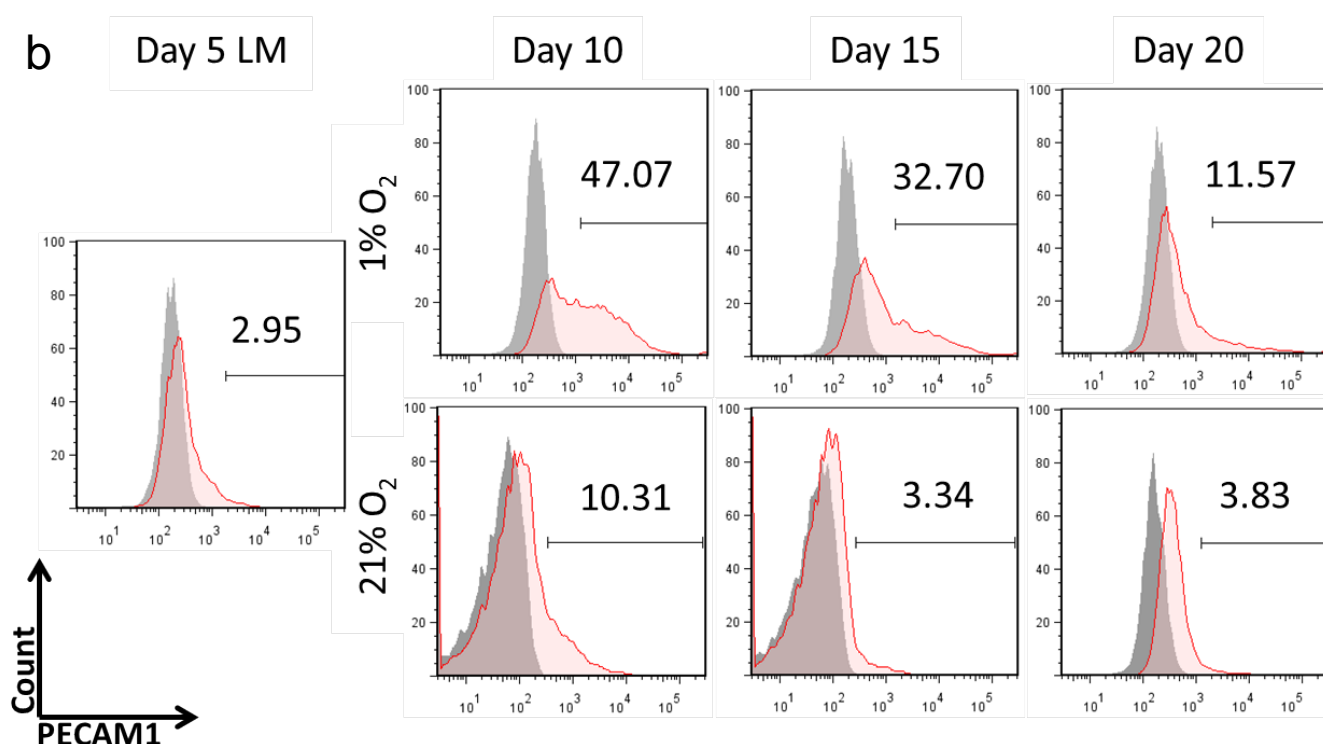

**Supplementary Figure S1. Efficiency of endothelial differentiation in H9-ESCs.** (a) Expression of endothelial genes over time under 1% or 21% O<sub>2</sub> culture. Data is represented as fold change over unstimulated control  $\pm$  SEM. \**p*-value < 0.05 \*\*\**p*-value < 0.001. (b) Representative histogram plots of PECAM1-expressing cells during endothelial differentiation (day 10, 15, 20), under 1% O<sub>2</sub> vs 21% O<sub>2</sub> condition.

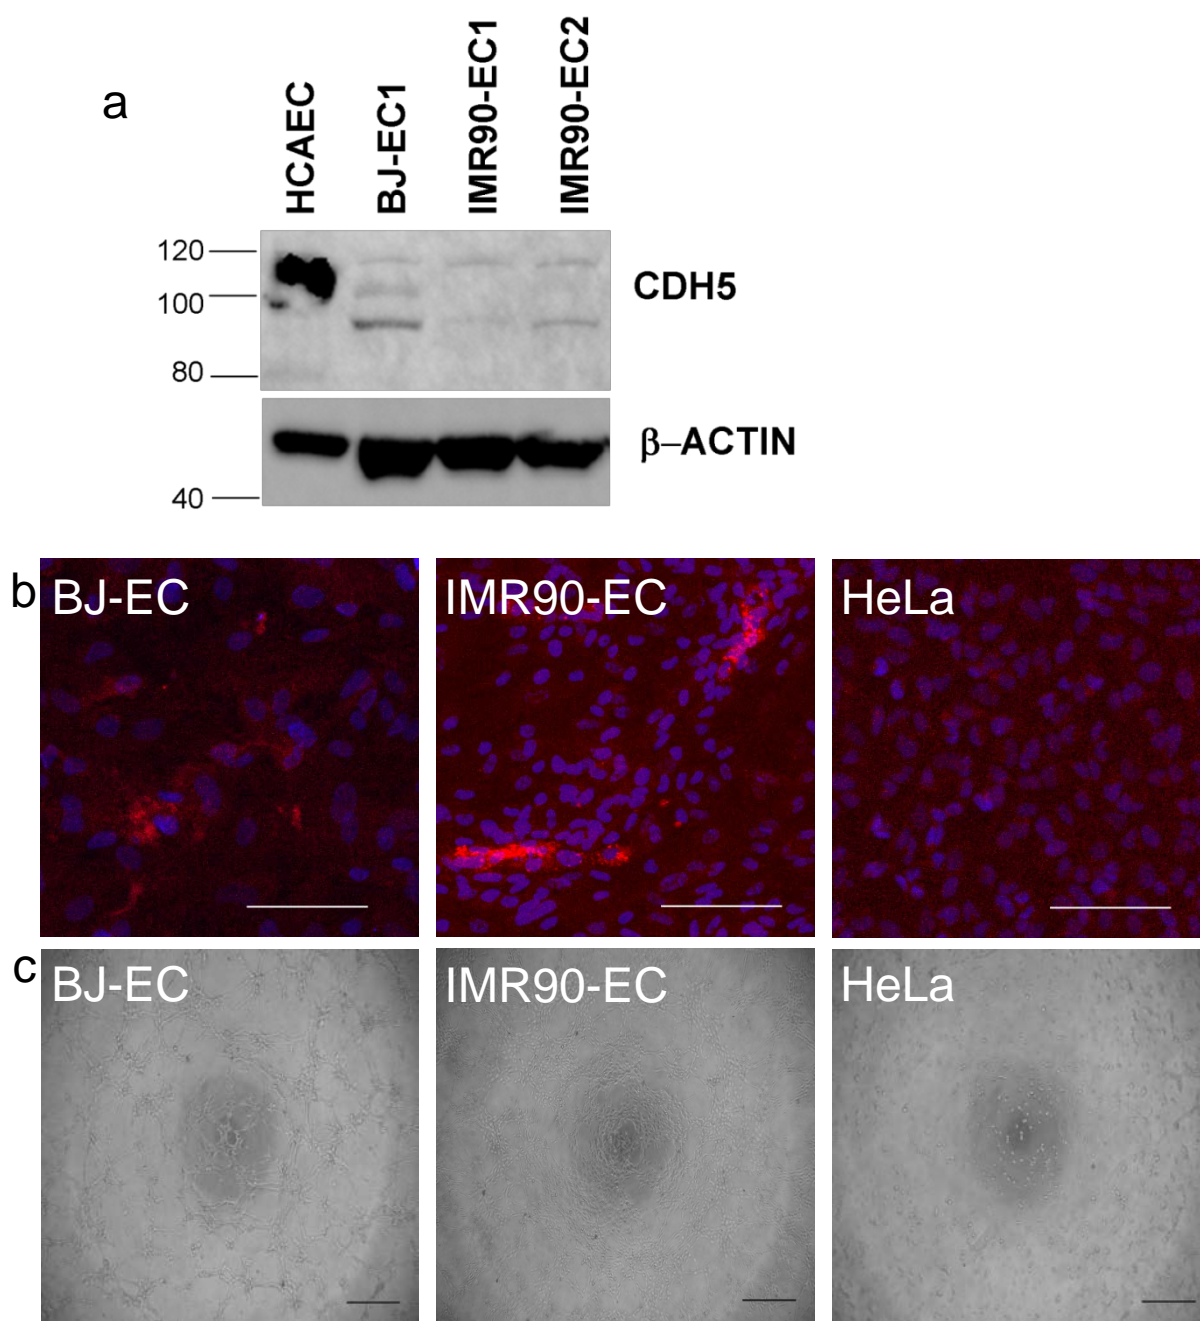

**Supplementary Figure S2. Functional characterization of endothelial cells from BJ and IMR90 induced pluripotent stem cell lines.** (a) Western blot of CDH5 protein in HCAEC, BJ-EC, IMR90-EC (duplicates). Glycosylated forms of CDH5 were detected. (b) Immunostaining of vWF in BJ-EC, IMR90-EC and HeLa cells (negative control). Scale bars, 100  $\mu$ m. (c) Tube formation assay of BJ-EC and IMR90-EC seeded on matrigel plugs. Scale bars, 500  $\mu$ m.

a

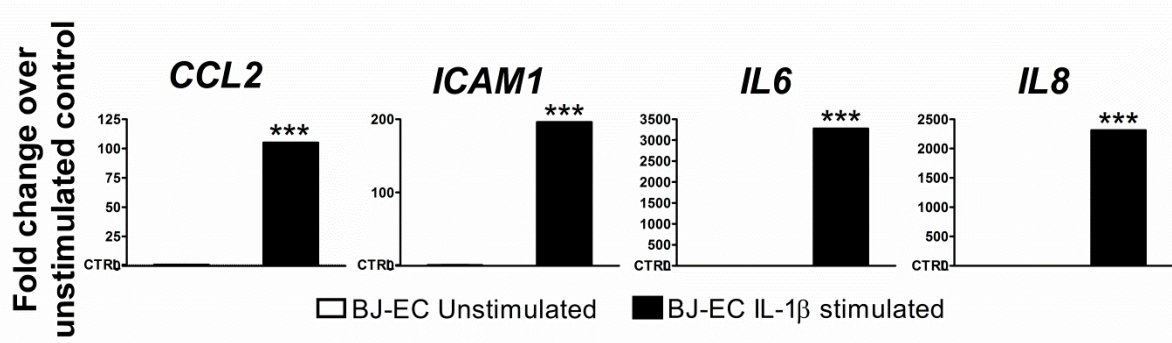

a(i)

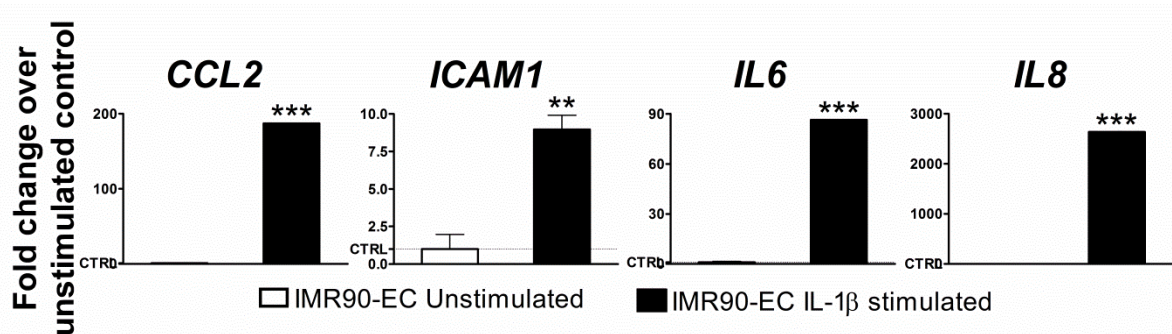

b.(i)

UNSTIMULATED

IL-1 $\beta$

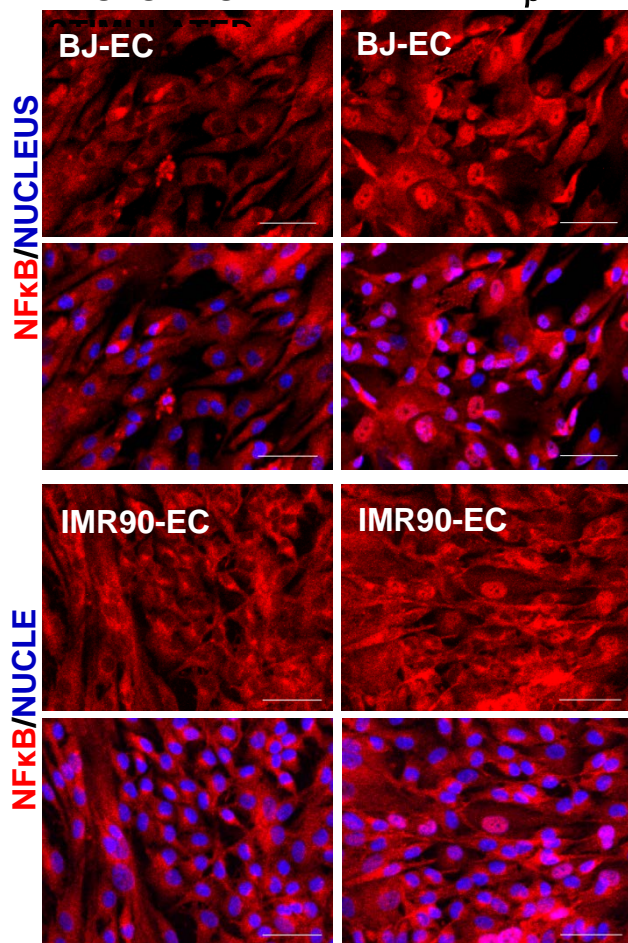

b.(ii)

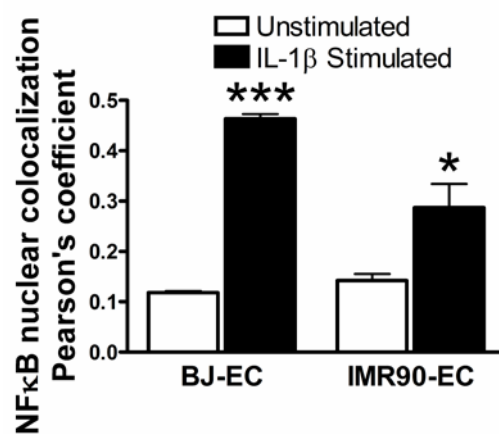

c

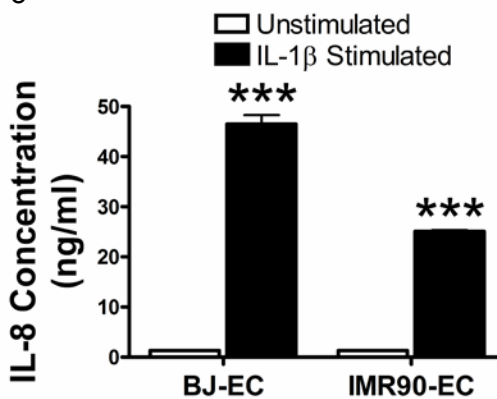

**Supplementary Figure S3: Inflammatory activation in BJ-ECs and IMR90-ECs. (a)**

Increased expression in inflammatory marker genes upon IL-1 $\beta$  stimulation in BJ-ECs and IMR90- ECs. Data is represented as fold change over unstimulated control  $\pm$  SD. \*\* $p$ -value <0.01 \*\*\* $p$ -value < 0.001. **(b.i)** Immunofluorescent images of NF $\kappa$ B nuclear translocation upon IL-1 $\beta$  stimulation in BJ- ECs (top four panels) and IMR90- ECs (bottom four panels). Scale bar = 50  $\mu$ m. **(b.ii.)** Quantification of immunofluorescent images shows significant increase in NF $\kappa$ B nuclear colocalization. \* $p$ -value < 0.05, \*\*\* $p$ -value < 0.001. **(c)** Increased IL-8 protein levels in the IL-1 $\beta$ -stimulated BJ- ECs and IMR90- ECs. \*\*\* $p$ -value < 0.001.

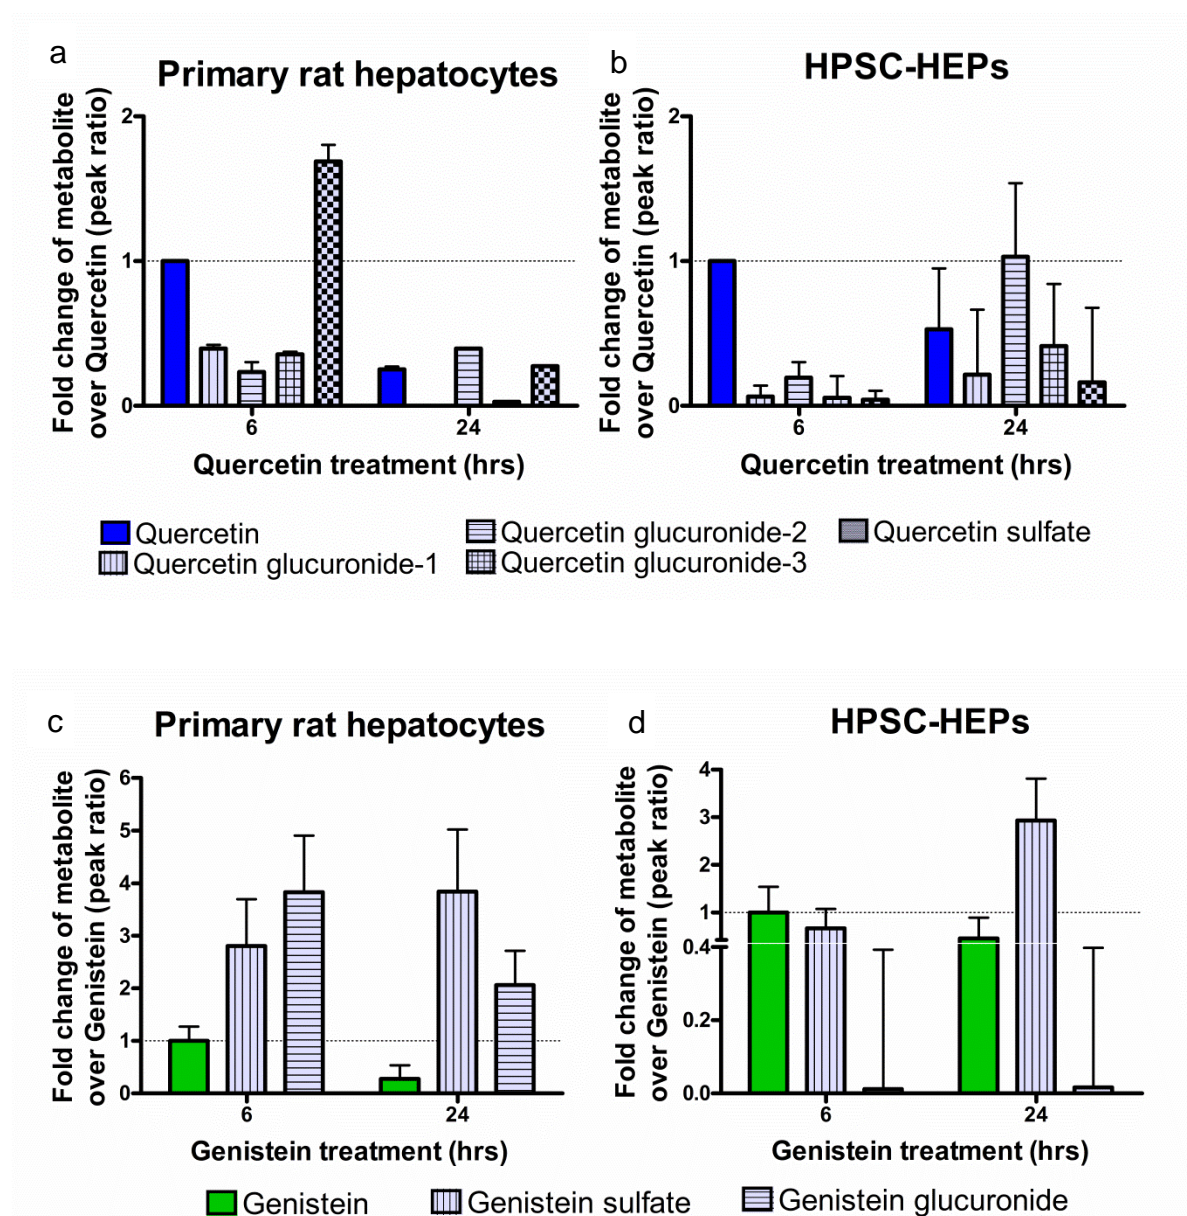

**Supplementary Figure S4: Turnover of metabolites from quercetin (a,b) and genistein (c,d) in H9-ESC-HEPs and primary rat hepatocytes.** Data is represented as fold change in the metabolite levels over parent metabolite at 6hrs, fold change in peak ratio (metabolite peak/IS peak)  $\pm$  SD, n=3.

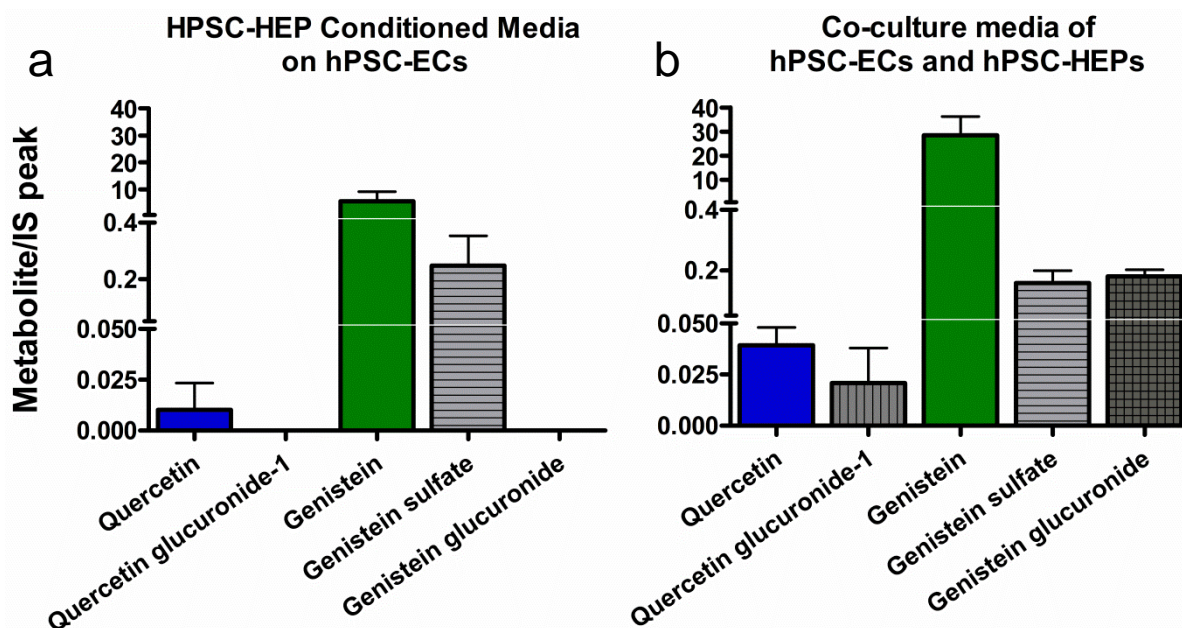

**Supplementary Figure S5. LCMS analysis of quercetin and genistein metabolites in conditioned media and co-cultures.** Metabolite profile of quercetin and genistein in (a) hPSC-HEP conditioned media treated on hPSC-ECs and (b) co-cultured media as measured by LCMS.

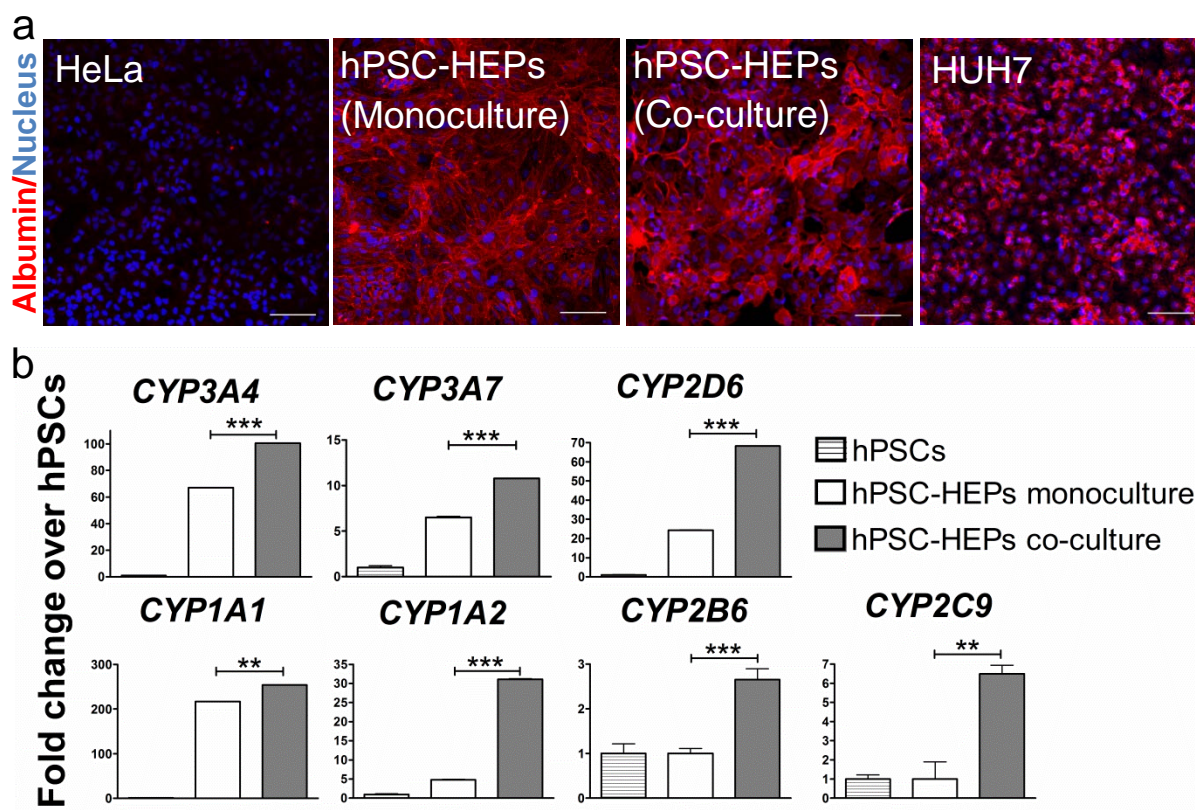

**Supplementary Figure S6: Functional characterization of H9-ESC-HEPs co-cultured with H9-ESC-ECs.** (a) Albumin immunofluorescence in hPSC-HEPs in monoculture and co-culture shows similar levels of expression in both the culture configurations. Scale bar = 100  $\mu$ m. (b) The hPSC-HEPs co-cultured with hPSC-ECs express higher levels of CYP genes than the hPSC-HEPs in monoculture supporting the beneficial effects of endothelial cells on hPSC-HEPs metabolic potential.  $n=3$ . Data is represented as fold change over undifferentiated hPSCs  $\pm$  SD. \*\* $p$ -value < 0.01, \*\*\* $p$ -value < 0.001.

## Supplementary Tables

## Supplementary Table 1 Primer sequences for qPCR

| Genes                          | Sequences                 |
|--------------------------------|---------------------------|
| <i>CD31</i>                    | CAGGCGCCGGGAGAAGTGAC      |
|                                | CGTCCAGTCCGGCAGGCTCT      |
| <i>CDH5</i>                    | TGGCCAGCTGGTCCTGCAGAT     |
|                                | TGCCCGTGCGACTTGGCATC      |
| <i>TIE2</i>                    | GCAGTGCAATGAAGCATGCCACC   |
|                                | GGTAGCGGCCAGCCAGAAGC      |
| <i>CD34</i>                    | CACAGGAGAAAGGCTGGGCGA     |
|                                | TGGCCGTTTCTGGAGGTGGC      |
| <i>VWF</i>                     | TAGCCCGCCTCCGCCAGAAT      |
|                                | CCTGCAGGCGCAGGTGAAGT      |
| <i>VEGF<math>\alpha</math></i> | GCACATAGGAGAGATGAGCTTC    |
|                                | CCACAGGGACGGGATTTCTTG     |
| <i>NFKB1</i>                   | ACTACCTGGTGCCTCTAGTGA     |
|                                | TTTGACCTGAGGGTAAGACTTCT   |
| <i>MCP1</i>                    | AAGCTCGCACTCTCGCCTCCA     |
|                                | GCATTGATTGCATCTGGCTGAGCG  |
| <i>IL6</i>                     | AAATTCGGTACATCCTCGACGG    |
|                                | GGAAGGTTCAAGTTGTTTTCTGC   |
| <i>IL8</i>                     | TTGGCAGCCTTCCTGATTTCTGCAG |
|                                | ACAACCCTCTGCACCCAGTTTTTC  |
| <i>VCAM1</i>                   | ATGGTCGCGATCTTCGGAGCC     |
|                                | AACGGACTTGGCCCCCTCTGT     |
| <i>ICAM1</i>                   | ACCGGAAGGTGTATGAACTGA     |
|                                | TGGTTGGCTATCTTCTTGAC      |
| <i>bFGF</i>                    | AGCGACCCTCACATCAAGCTACA   |
|                                | CTGCCAGTTCGTTTCAGTGCCA    |
| <i>CYP3A4</i>                  | AAGTCGCCTCGAAGATACACA     |
|                                | AAGGAGAGAACACTGCTCGTG     |
| <i>CYP3A7</i>                  | TGCTTTGTCCTTCCGTAAGGG     |
|                                | CAGCATAGGCTGTTGACAGTC     |
| <i>CYP2B6</i>                  | GCACTCCTCACAGGACTCTTG     |
|                                | CCCAGGTGTACCGTGAAGAC      |
| <i>CYP1A1</i>                  | ACATGCTGACCCTGGGAAAG      |
|                                | GGTGTGGAGCCAATTCGGAT      |
| <i>CYP1A2</i>                  | ATGCTCAGCCTCGTGAAGAAC     |
|                                | GTTAGGCAGGTAGCGAAGGAT     |
| <i>CYP2C9</i>                  | GCCTGAAACCCATAGTGGTG      |
|                                | GGGGCTGCTCAAATCTTGATG     |



**Supplementary Table 2.** Antibodies list

| <b>Proteins</b>    | <b>Applications</b> | <b>Dilution factors</b> | <b>Source</b>      |
|--------------------|---------------------|-------------------------|--------------------|
| NFκB               | IMMUNO              | 1:200                   | ABCAM (AB32536)    |
| VWF                | IMMUNO              | 1:100                   | ABCAM (AB9378)     |
| CDH5 (VE-cadherin) | WESTERN             | 1:1000                  | ABCAM (AB33168)    |
| B-ACTIN            | WESTERN             | 1:1000                  | SIGMA (SAB2100037) |
| eNOS               | IMMUNO              | 1:100                   | ABCAM (AB5589)     |
| Albumin            | IMMUNO              | 1:100                   | R&D (MAB1455-SP)   |
